# Supplementary material for: Cell Surface Proteome of Dental Pulp Stem Cells Identified by Label-Free Mass Spectrometry
Source: PubMed Central journal article supplement (PMC4973913; doi:10.1371/journal.pone.0159824), 2016-08-04

Uncropped gels presented in Fig. 6A

bp  
2072 -  
1500 -  
600 -  
100 -

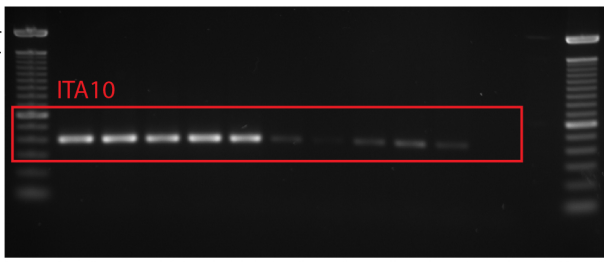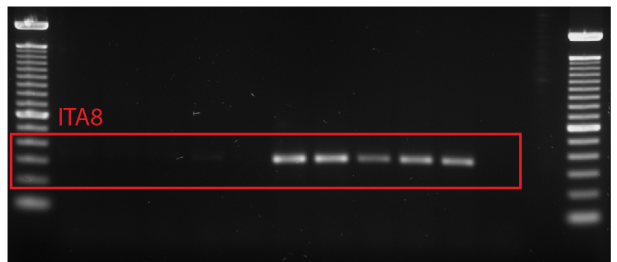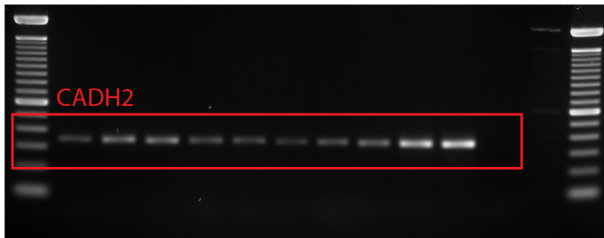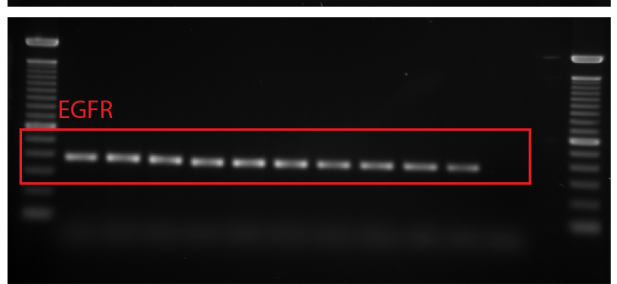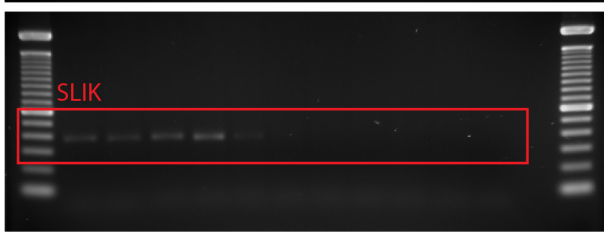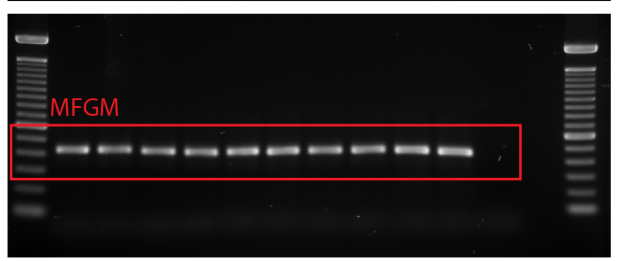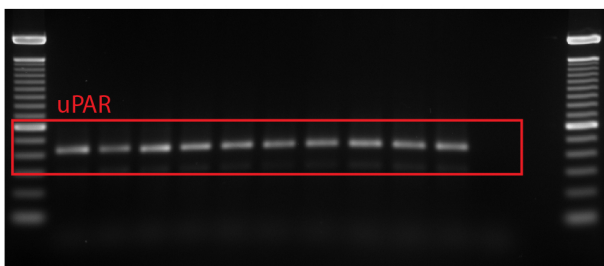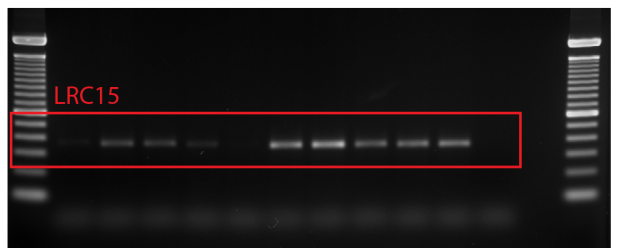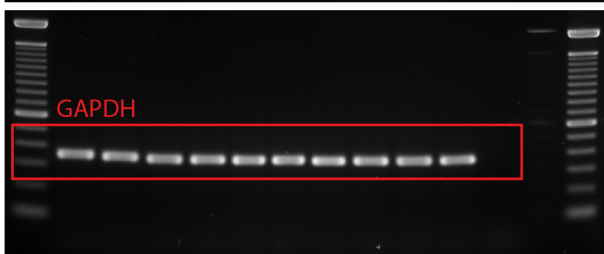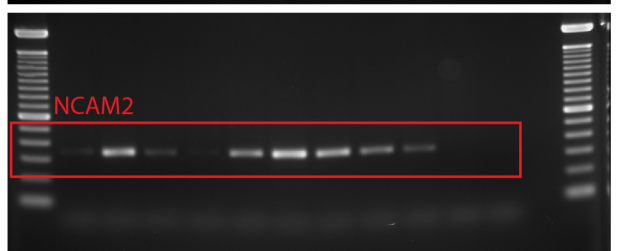

Uncropped immunoblots presented in Fig. 6C

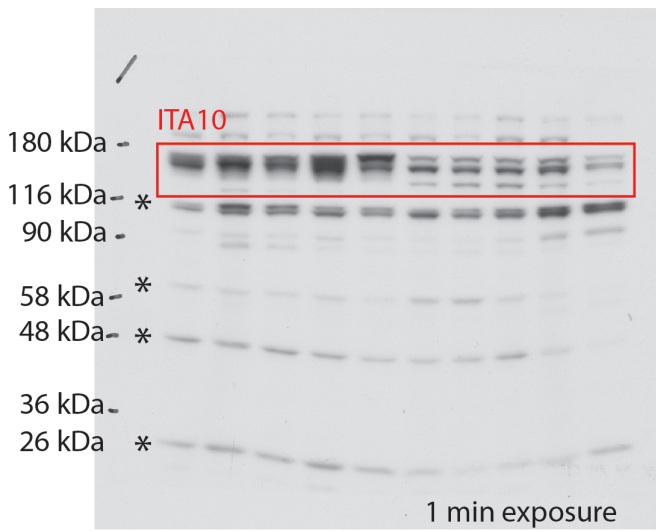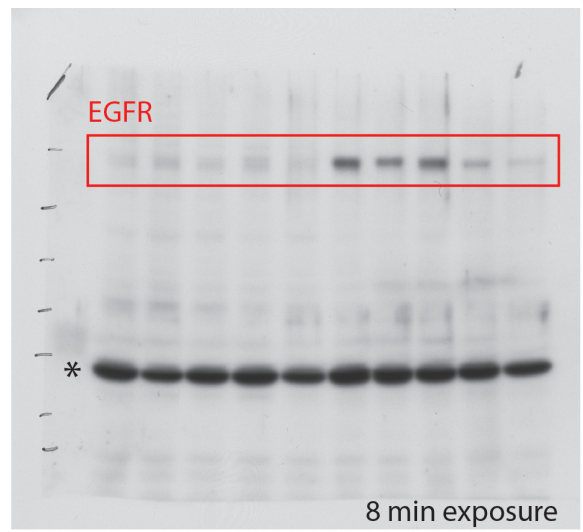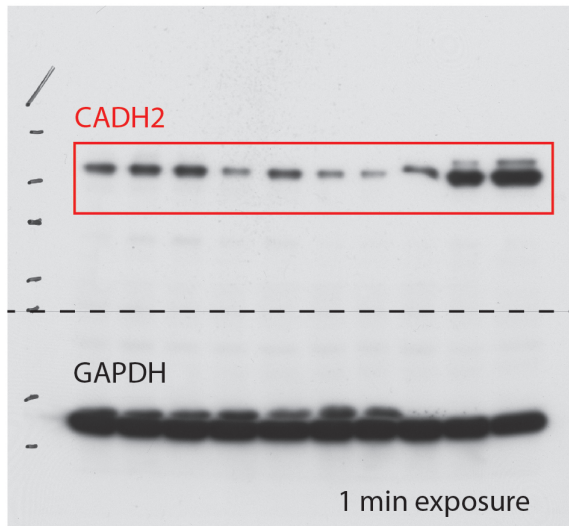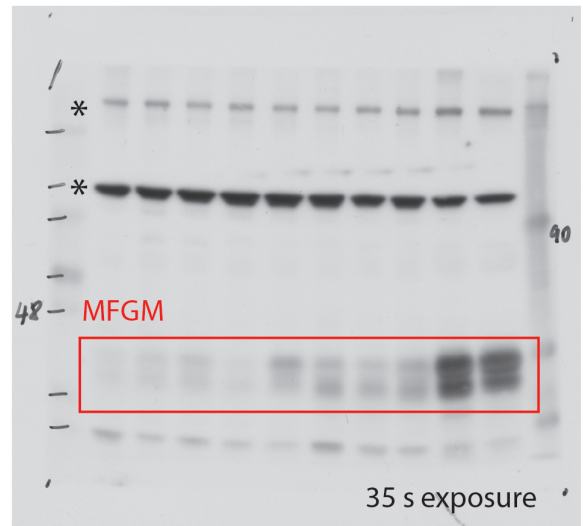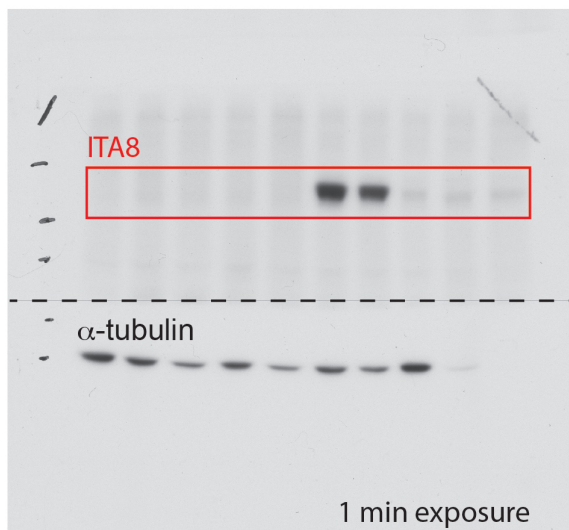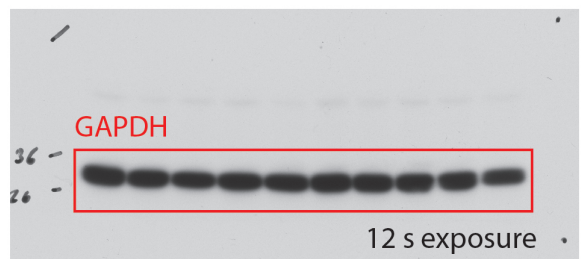

\* Non-specific band

Uncropped immunoblots presented in Fig. S8A

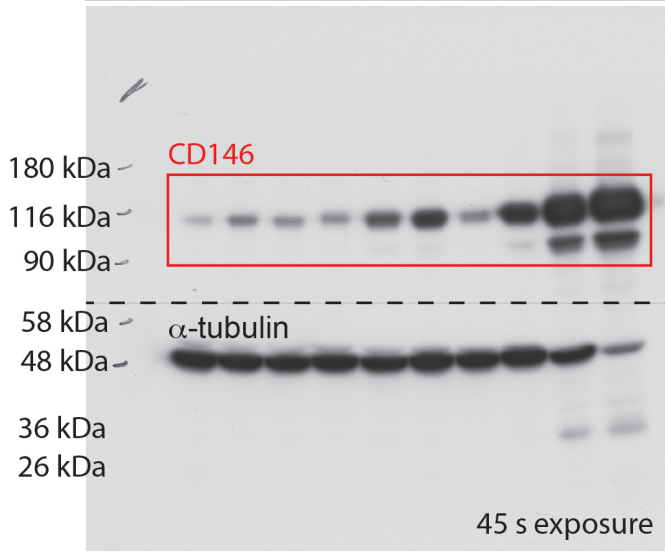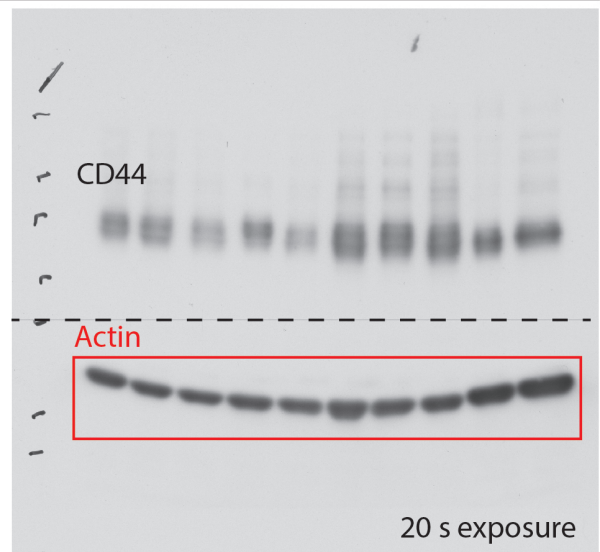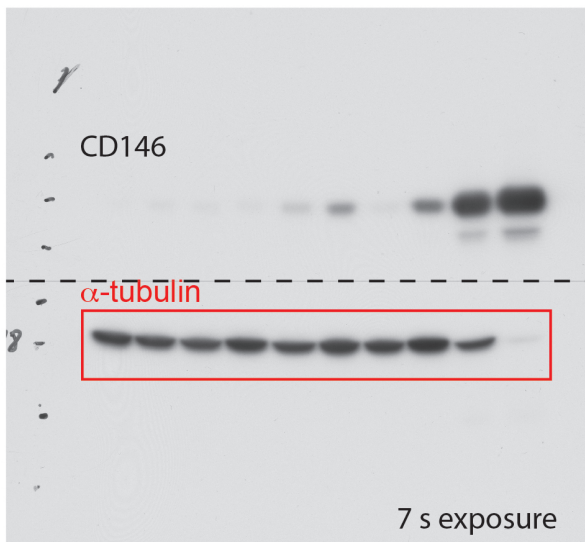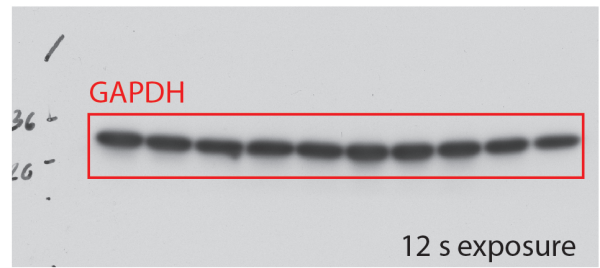

Supplement: pone.0159824.s009.pdf [file pone.0159824.s009.pdf]
